# Supplementary material
Source: PubMed Central journal article supplement (PMC7960370)
Supplement: 16-00793.pdf [file 16-00793.pdf]

**On-line Table: Follow-up of 5 patients**

| Patient No. | Age (yr)/Sex | Presentation                                    | Affected Vessels and Diameter     | Intra-Aneurysmal Thrombus? | Aneurysm Growth? | Which Aneurysm Ruptured  | Symptomatic? | Treatment | Final mRS | Cause                                            |
|-------------|--------------|-------------------------------------------------|-----------------------------------|----------------------------|------------------|--------------------------|--------------|-----------|-----------|--------------------------------------------------|
| 1           | 49/M         | Posterior circulation stroke                    | Basilar: 20 mm; left ICA: 10 mm   | Yes                        | No               | Basilar                  | Yes          | None      | 6         | Died of aneurysm rupture from the basilar artery |
| 2           | 74/M         | Incidental, herpes simplex encephalitis history | Basilar: 20 mm; right ICA: 13 mm  | Yes                        | Yes              | Basilar                  | Yes          | None      | 6         | Aneurysm rupture                                 |
| 3           | 55/M         | Amaurosis fugax                                 | Left ICA: 12 mm; right ICA: 10 mm | No                         | Yes              | Unknown                  | Yes          | None      | 6         | Died of massive cerebral hemorrhage              |
| 4           | 64/M         | Visual blurring                                 | Basilar: 20 mm; right ICA: 8 mm   | No                         | Yes              | Basilar                  | Yes          | None      | 6         | Aneurysm rupture                                 |
| 5           | 27/M         | Diplopia from mass effect                       | Left ICA: 25 mm; right ICA: 17 mm | No                         | Yes              | PICA dissecting aneurysm | Yes          | Coiling   | 3         | Difficulty walking, syring                       |
